# Supplementary material for: Photo-catalyzed surface hydrolysis of iridium(iii) ions on semiconductors: a facile method for the preparation of semiconductor/IrOx composite photoanodes toward oxygen evolution reaction
Source: Royal Society of Chemistry journal article supplement (doi:10.1039/c6cp06821a), 2016-11-22
Supplement: c6cp06821a1.pdf [file c6cp06821a1.pdf]

## Supporting Information

### **Photo-catalyzed Surface Hydrolysis of Iridium (III) Ions on Semiconductors: A Facile Method for Preparation of Semiconductor/IrO<sub>x</sub> Composite Photoanodes toward Oxygen Evolution Reaction**

*Qingyong Wu, Di Xu, Ning Xue, Tengyi Liu, Min Xiang and Peng Diao\**

Key Laboratory of Aerospace Materials and Performance (Ministry of Education), School of Materials

Science and Engineering, Beihang University, Beijing 100191, P.R.China

\*Corresponding author. Tel +86-10-8233 9562. E-mail address : [pdiao@buaa.edu.cn](mailto:pdiao@buaa.edu.cn)

**Fig. S 1**

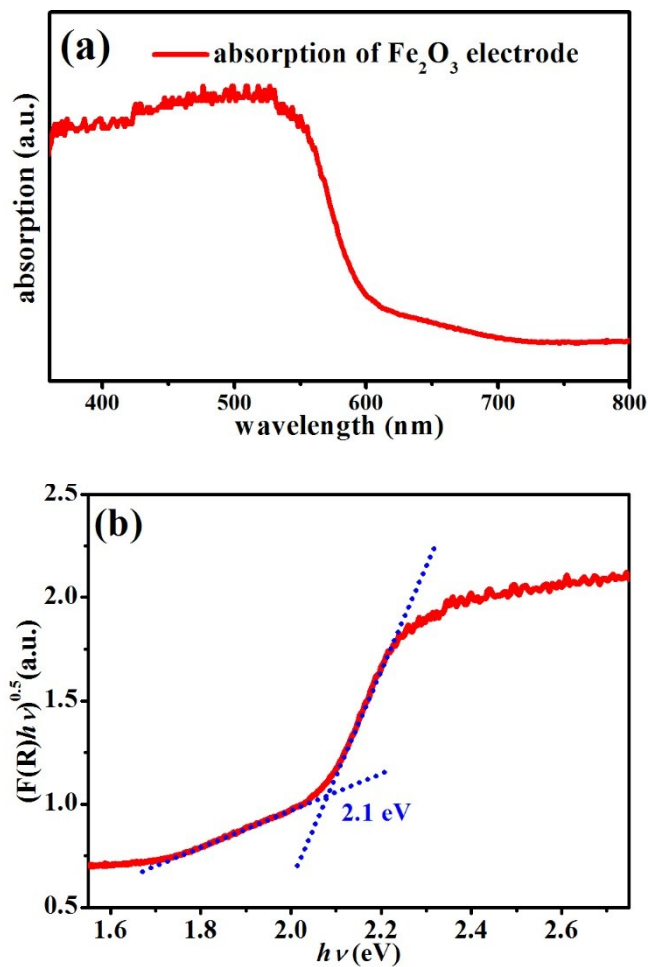

**Fig. S1.** (a) UV-Vis absorption spectrum and (b) the corresponding Tauc plot of Fe<sub>2</sub>O<sub>3</sub> electrode.

**Fig. S 2**

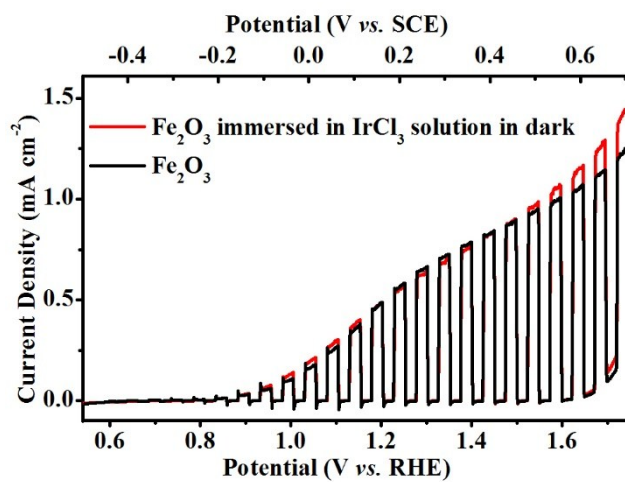

**Fig. S2.** *J-V* curves of Fe<sub>2</sub>O<sub>3</sub> photoanode in 1 M KOH under chopped illumination before (black line) and after (red line) it was immersed in the 2 mM IrCl<sub>3</sub> solution (pH12) for 2 h without irradiation and then rinsed with water. The incident light intensity was 100 mW·cm<sup>-2</sup>.
